# Supplementary material
Source: Springer Nature journal article supplement (https://www.springermedizin.de/resource/supplementary/12889_2011_3376_MOESM2_ESM.pdf/9488900)
Supplement: MOESM2 [file 9488900]

**SOCIETAL****IMPACT****APPLICATION FORM FOR AUTHORS**

|                                                                        |                                                                                                                                |                                                                                                                                                                |
|------------------------------------------------------------------------|--------------------------------------------------------------------------------------------------------------------------------|----------------------------------------------------------------------------------------------------------------------------------------------------------------|
| <b>NAME OF AUTHOR(S):</b>                                              |                                                                                                                                | <b>TITLE OF PUBLICATION AND SOURCE:</b><br><br>First application: yes   no   (last score for societal impact:   )<br>Other relevant publications: enclose list |
| <b>AIM OF PUBLICATION</b>                                              | <b>AUTHOR'S SELF-EVALUATION</b>                                                                                                | <b>AUTHOR'S JUSTIFICATIONS AND/OR EXPLANATIONS</b> (please enlarge space if necessary):                                                                        |
| Gain of knowledge OR application of knowledge OR increase in awareness | <input type="checkbox"/> yes (1)<br><input type="checkbox"/> no (0)                                                            |                                                                                                                                                                |
| <b>TRANSLATION</b>                                                     |                                                                                                                                |                                                                                                                                                                |
| Specific activities or initiatives undertaken                          | <input type="checkbox"/> yes (1)<br><input type="checkbox"/> no (0)                                                            |                                                                                                                                                                |
| accomplished                                                           | <input type="checkbox"/> yes<br><input type="checkbox"/> no                                                                    |                                                                                                                                                                |
| <b>IF TRANSLATION ACC.</b>                                             |                                                                                                                                |                                                                                                                                                                |
| Level                                                                  | <input type="checkbox"/> regional (1)<br><input type="checkbox"/> national (2)<br><input type="checkbox"/> international (3)   |                                                                                                                                                                |
| Status                                                                 | <input type="checkbox"/> preliminary (1)<br><input type="checkbox"/> permanent (2)                                             |                                                                                                                                                                |
| Target group                                                           | <input type="checkbox"/> individuals (1)<br><input type="checkbox"/> subpopulations (2)<br><input type="checkbox"/> public (3) |                                                                                                                                                                |
| <b>Total score</b>                                                     |                                                                                                                                |                                                                                                                                                                |

*I declare that the publication submitted is original and had an impact on health, society of practice reality as described above and was not primarily a means to support translation and implementation of research results published previously in another journal by me/the authors.*

*Author's signature.....at.....in.....*
